# Supplementary material for: Caspase 6/NR4A1/SOX9 signaling axis regulates hepatic inflammation and pyroptosis in ischemia-stressed fatty liver
Source: Springer Nature journal article supplement (doi:10.1038/s41420-023-01396-z), 2023-03-28
Supplement: MOESM1 [file 41420_2023_1396_MOESM1_ESM.pdf]

## The agreement of the addition to the author list in the manuscript

- Manuscript Number: CDDISCOVERY-23-0094R1
- Title: Caspase 6/NR4A1/SOX9 signaling axis regulates hepatic inflammation and pyroptosis in ischemia-stressed fatty liver
- Authors: Wenli Yu, Mingwei Sheng, Yiqi Weng, Yingli Cao, Chen Zhang, and Yuanbang Lin

## The request agreement from co-authors addition to the manuscript.

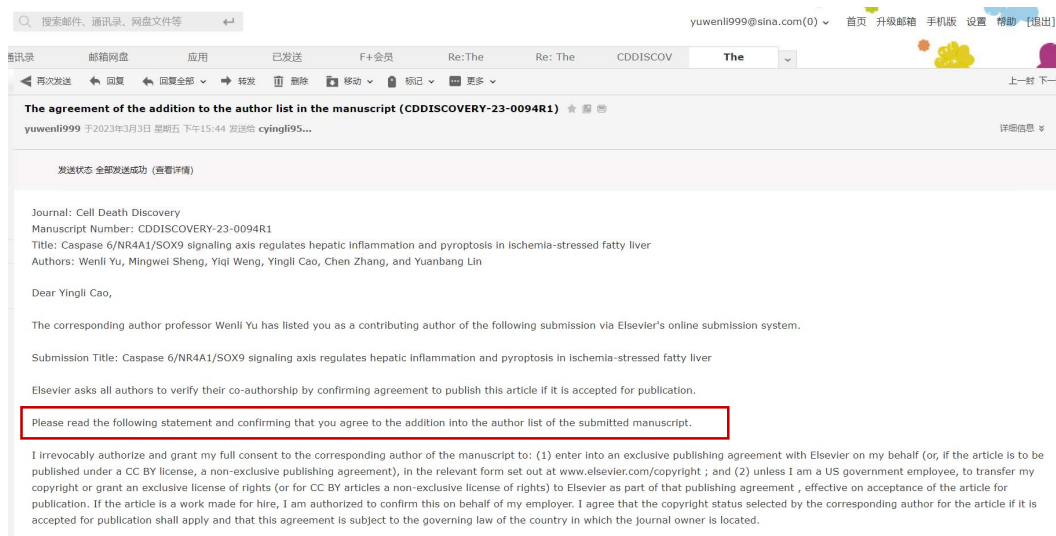

## The response from Yingli Cao

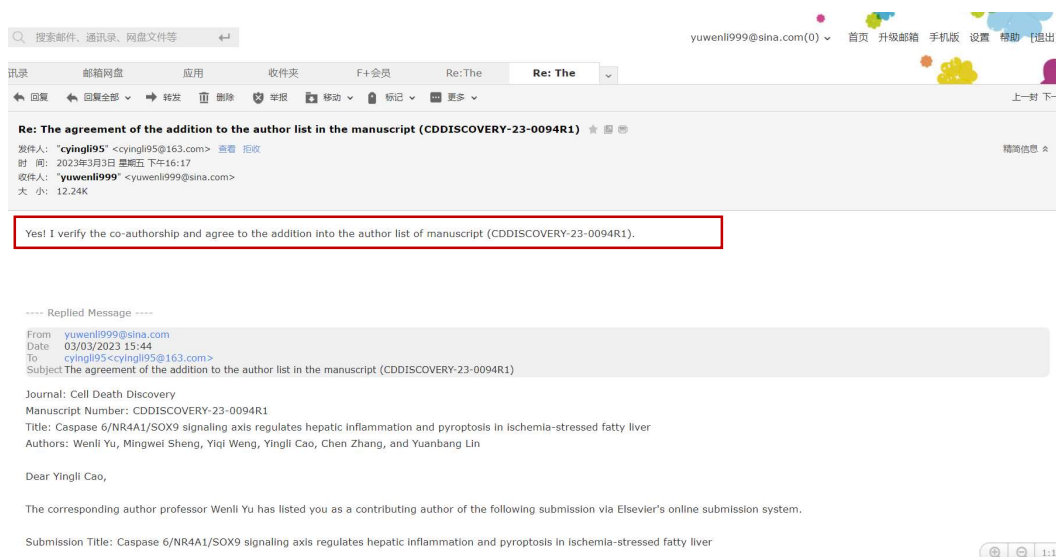

## The response from Chen Zhang

yuwenli999@sina.com(0)

首页 升级邮箱 手机版 设置 帮助 [退出]

通讯录 邮箱网盘 应用 收件夹 F+会员 Re:The

返回 回复全部 转发 删除 举报 移动 标记 更多

Re:The agreement of the addition to the author list in the manuscript (CDDISCOVERY-23-0094R1)

发件人: 'zhangchen201608' <zhangchen201608@163.com> 查看 拒收  
时 间: 2023年3月3日 星期五 下午16:30  
收件人: 'yuwenli999' <yuwenli999@sina.com>  
大 小: 12.82K

下一封

Yes, I confirm that I agree to the addition into the author list of the submitted manuscript (Caspase 6/NR4A1/SOX9 signaling axis regulates hepatic inflammation and pyroptosis in ischemia-stressed fatty liver).

清晨的香樟树

邮箱: zhangchen201608@163.com

At 2023-03-03 15:53:12, yuwenli999@sina.com wrote:  
Journal: Cell Death Discovery  
Manuscript Number: CDDISCOVERY-23-0094R1  
Title: Caspase 6/NR4A1/SOX9 signaling axis regulates hepatic inflammation and pyroptosis in ischemia-stressed fatty liver  
Authors: Wenli Yu, Mingwei Sheng, Yiqi Weng, Yingli Cao, Chen Zhang, and Yuanbang Lin

Dear Chen Zhang,

The corresponding author professor Wenli Yu has listed you as a contributing author of the following submission via Elsevier's online submission system.

1:1
